# Supplementary material for: Inter-nesting movements and habitat-use of adult female Kemp’s ridley turtles in the Gulf of Mexico
Source: PLOS journal article supplement (doi:10.1371/journal.pone.0174248), 2017-03-20
Supplement: S1 (10.1371/journal.pone.0174248.s001) [file journal.pone.0174248.s001]

**S1 Table. Platform transmitter terminals (PTTs) specifications including type and duty cycle of PTTs used, and accuracy of Argos Location Classes for nesting Kemp's ridley turtles (*Lepidochelys kempii*) tracked in the western Gulf of Mexico.**

| PTT Specifications                                                         |
|----------------------------------------------------------------------------|
| <b><i>PTT Models</i></b>                                                   |
| Telonics, Inc. (Mesa, Arizona, USA) ST-6, ST-18, ST-20 (n=37)              |
| Sirtrack (Haverloc North, New Zealand) KS-101, KS-202 (n=20)               |
| Wildlife Computers (Redmond, WA, USA) MK-10A, MK-AF, SPOT5 (n=25)          |
| <b><i>Duty Cycles by Year</i></b>                                          |
| 6 h on/6 h off (1998 through 2007)                                         |
| 24 h d <sup>-1</sup> for the first 106 days and then 6 h on/6 h off (2008) |
| 6 h on/6 h off for KS-101, KS-202 (2010 through 2013)                      |
| 24 h d <sup>-1</sup> for MK-10A, MK10AF, SPOT5 (2010 through 2013)         |
| <b><i>Argos Assigned Accuracy Estimates of Location Classes</i></b>        |
| LC3: <250 m                                                                |
| LC2: 250-<500 m                                                            |
| LC1: 500-<1500 m                                                           |
| LC0: >1500 m                                                               |
| LCA: unknown                                                               |
| LCB: unknown                                                               |
| LCZ: unknown                                                               |
